# Supplementary material for: Demographic characteristics and spatial clusters of recent HIV-1 infections among newly diagnosed HIV-1 cases in Yunnan, China, 2015
Source: Springer Nature journal article supplement (doi:10.1186/s12889-019-7557-8), 2019-11-11
Supplement: MOESM1 [file 17374526]

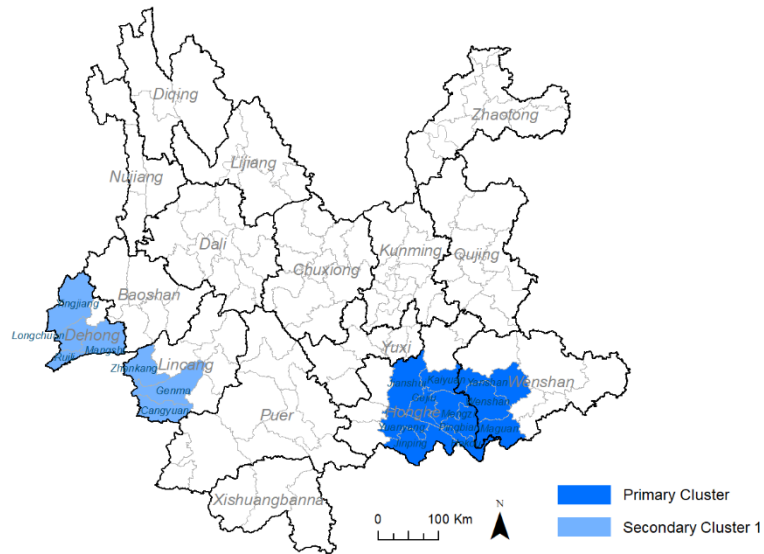

**Additional file 1: Spatial clusters of recent HIV-1 infections attributed to heterosexual contact by using the ellipse scanning window.** The shapefile of China was downloaded from the GADM database ([www.gadm.org](http://www.gadm.org)), version 3.4, April 2018, from which the shapefile of Yunnan was extracted with Quantum GIS.
