# Supplementary material for: Demographic characteristics and spatial clusters of recent HIV-1 infections among newly diagnosed HIV-1 cases in Yunnan, China, 2015
Source: Springer Nature journal article supplement (doi:10.1186/s12889-019-7557-8), 2019-11-11
Supplement: MOESM2 [file 17374526]

**Additional file 2. The spatial scan statistics analysis by using different percentages of the population at risk.**

| Spatial Clusters              |                     | County Code                                                                                                  | Number of cases | Relative Risk | Log Likelihood Ratio | <i>p</i> -value |
|-------------------------------|---------------------|--------------------------------------------------------------------------------------------------------------|-----------------|---------------|----------------------|-----------------|
| <b>Heterosexual contact</b>   |                     |                                                                                                              |                 |               |                      |                 |
| 5% of the population at risk  | Primary Cluster     | 53252300, 53252200, 53253200, 53262100, 53262500                                                             | 58              | 4.18          | 36.6                 | 2.0E-15         |
|                               | Secondary Cluster 1 | 53310200, 53312400, 53310300, 53312300                                                                       | 35              | 3.51          | 18.2                 | 3.0E-07         |
|                               | Secondary Cluster 2 | 53082700, 53082900, 53082800, 53282200, 53092700, 53092500, 53092600, 53080200                               | 43              | 2.27          | 10.5                 | 8.1E-04         |
| 10% of the population at risk | Primary Cluster     | 53252200, 53252300, 53250100, 53250200, 53262100, 53253200, 53252800, 53253000, 53262200, 53252400, 53262500 | 108             | 3.17          | 44.1                 | <1.0E-17        |
|                               | Secondary Cluster 1 | 53310200, 53312400, 53310300, 53312300                                                                       | 35              | 3.51          | 18.2                 | 6.5E-07         |
|                               | Secondary Cluster 2 | 53082700, 53082900, 53082800, 53282200, 53092700, 53092500, 53092600, 53080200                               | 43              | 2.27          | 10.5                 | 2.0E-03         |

|                               |                     |                                                                                                                             |     |       |      |          |
|-------------------------------|---------------------|-----------------------------------------------------------------------------------------------------------------------------|-----|-------|------|----------|
| 25% of the population at risk | Primary Cluster     | 53252200, 53252300,<br>53250100, 53250200,<br>53262100, 53253200,<br>53252800, 53253000,<br>53262200, 53252400,<br>53262500 | 108 | 3.17  | 44.1 | <1.0E-17 |
|                               | Secondary Cluster 1 | 53310200, 53312400,<br>53310300, 53312300                                                                                   | 35  | 3.51  | 18.2 | 1.4E-06  |
|                               | Secondary Cluster 2 | 53082700, 53082900,<br>53082800, 53282200,<br>53092700, 53092500,<br>53092600, 53080200                                     | 43  | 2.27  | 10.5 | 2.0E-03  |
| 50% of the population at risk | Primary Cluster     | 53252200, 53252300,<br>53250100, 53250200,<br>53262100, 53253200,<br>53252800, 53253000,<br>53262200, 53252400,<br>53262500 | 108 | 3.17  | 44.1 | 2.2E-16  |
|                               | Secondary Cluster 1 | 53310200, 53312400,<br>53310300, 53312300                                                                                   | 35  | 3.51  | 18.2 | 2.5E-06  |
|                               | Secondary Cluster 2 | 53082700, 53082900,<br>53082800, 53282200,<br>53092700, 53092500,<br>53092600, 53080200                                     | 43  | 2.27  | 10.5 | 2.7E-03  |
| <b>Heterosexual contact</b>   |                     |                                                                                                                             |     |       |      |          |
| 5% of the population at risk  | Primary Cluster     | 53018100, 53011200                                                                                                          | 18  | 20.77 | 34.0 | 6.9E-14  |

|                                   |                     |                                           |    |       |      |          |
|-----------------------------------|---------------------|-------------------------------------------|----|-------|------|----------|
|                                   | Secondary Cluster 1 | 53290100                                  | 9  | 13.93 | 14.6 | 1.5E-05  |
| 10% of the population at risk     | Primary Cluster     | 53018100, 53011200                        | 18 | 20.77 | 34.0 | 3.3E-13  |
|                                   | Secondary Cluster 1 | 53290100                                  | 9  | 13.93 | 14.6 | 2.9E-05  |
| 25% of the population at risk     | Primary Cluster     | 53018100, 53011200                        | 18 | 20.77 | 34.0 | 7.7E-13  |
|                                   | Secondary Cluster 1 | 53290100                                  | 9  | 13.93 | 14.6 | 4.3E-05  |
| 50% of the population at risk     | Primary Cluster     | 53018100, 53011200                        | 18 | 20.77 | 34.0 | 2.6E-12  |
|                                   | Secondary Cluster 1 | 53290100                                  | 9  | 13.93 | 14.6 | 7.2E-05  |
| <b>Intravenous drug injection</b> |                     |                                           |    |       |      |          |
| 5% of the population at risk      | Primary Cluster     | 53310200, 53312400,<br>53310300, 53312300 | 30 | 51.07 | 75.9 | <1.0E-17 |
| 10% of the population at risk     | Primary Cluster     | 53310200, 53312400,<br>53310300, 53312300 | 30 | 51.07 | 75.9 | <1.0E-17 |
| 25% of the population at risk     | Primary Cluster     | 53310200, 53312400,<br>53310300, 53312300 | 30 | 51.07 | 75.9 | <1.0E-17 |
| 50% of the population at risk     | Primary Cluster     | 53310200, 53312400,<br>53310300, 53312300 | 30 | 51.07 | 75.9 | <1.0E-17 |

---
